# Supplementary material
Source: PubMed Central journal article supplement (PMC5006704)
Supplement: supp_tpc.16.00201_TPC2016-00201-RAR1_Supplemental_Data.pdf [file supp_tpc.16.00201_TPC2016-00201-RAR1_Supplemental_Data.pdf]

A

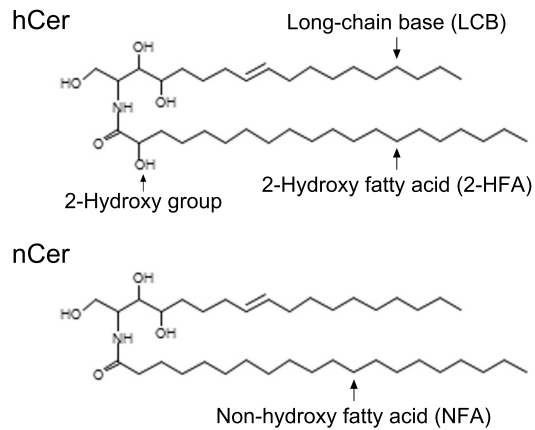

B

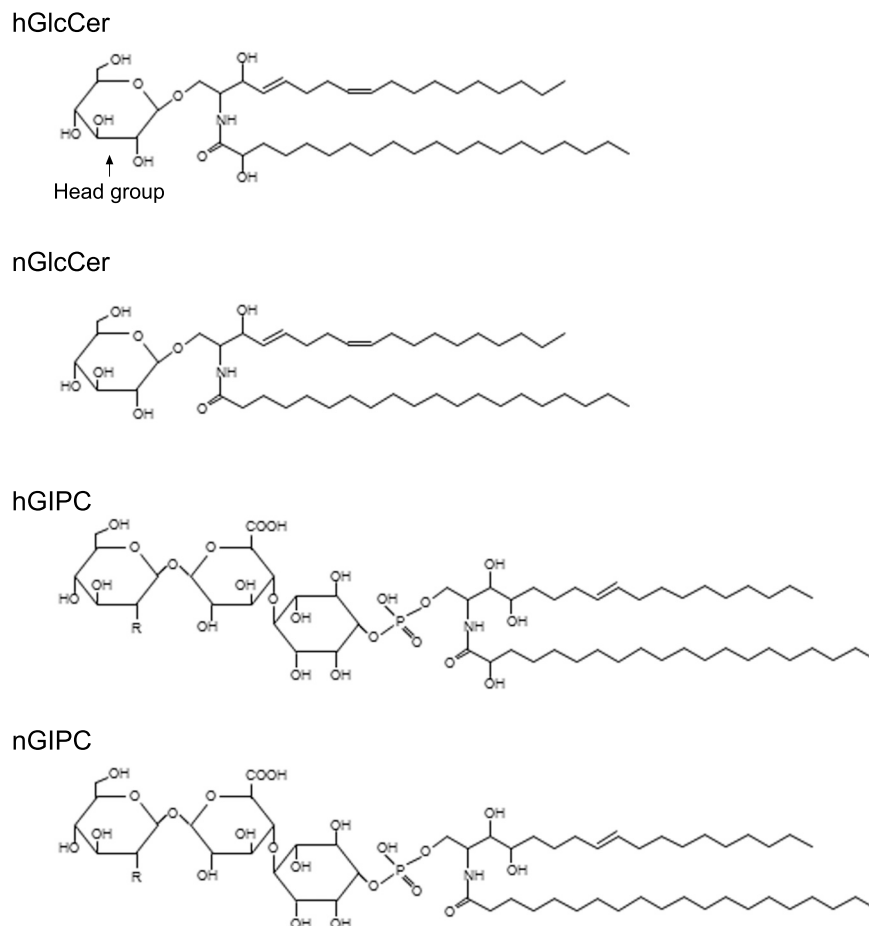

### Supplemental Figure 1: Examples of sphingolipids in plants

(A) Structures of representative ceramides (Cers). Cers comprise a long-chain base (LCB) amide-linked to a fatty acid. hCer, Cer containing 2-hydroxy fatty acid (2-HFA); nCer, Cer containing non-hydroxy fatty acid (NFA). (B) Structures of representative complex sphingolipids. Complex sphingolipids are formed by the addition of head groups to Cers. In plants, glucosylceramide (GlcCer) and glycosylinositolphosphoceramide (GIPC) are exclusive complex sphingolipids. hGlcCer, GlcCer containing 2-HFA; nGlcCer, GlcCer containing NFA; hGIPC, GIPC containing 2-HFA; nGIPC, GIPC containing NFA.

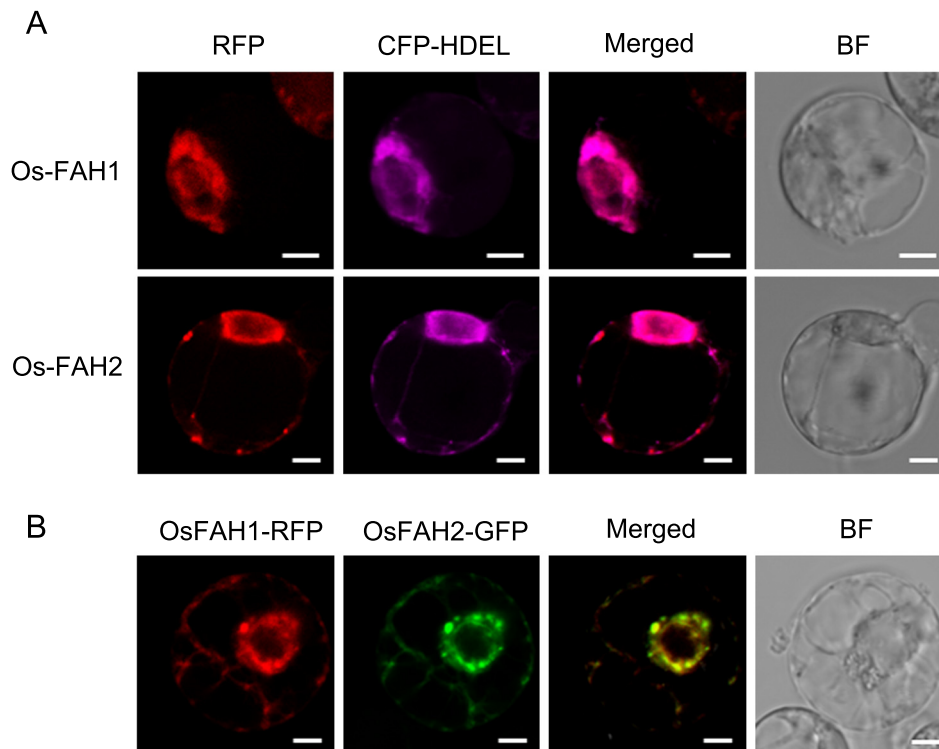

**Supplemental Figure 2: Subcellular localization of Os-FAH1 and Os-FAH2 in rice protoplasts**  
**(A)** Protoplasts produced from rice suspension culture cells were co-transformed with the plastids encoding CFP-HDEL and either OsFAH1-RFP or OsFAH2-RFP and observed by CLSM. Scale bars = 5  $\mu$ m. BF, bright field. **(B)** Rice protoplasts were co-transformed with plasmids encoding OsFAH1-RFP and OsFAH2-GFP, and observed by CLSM. Scale bars = 5  $\mu$ m.

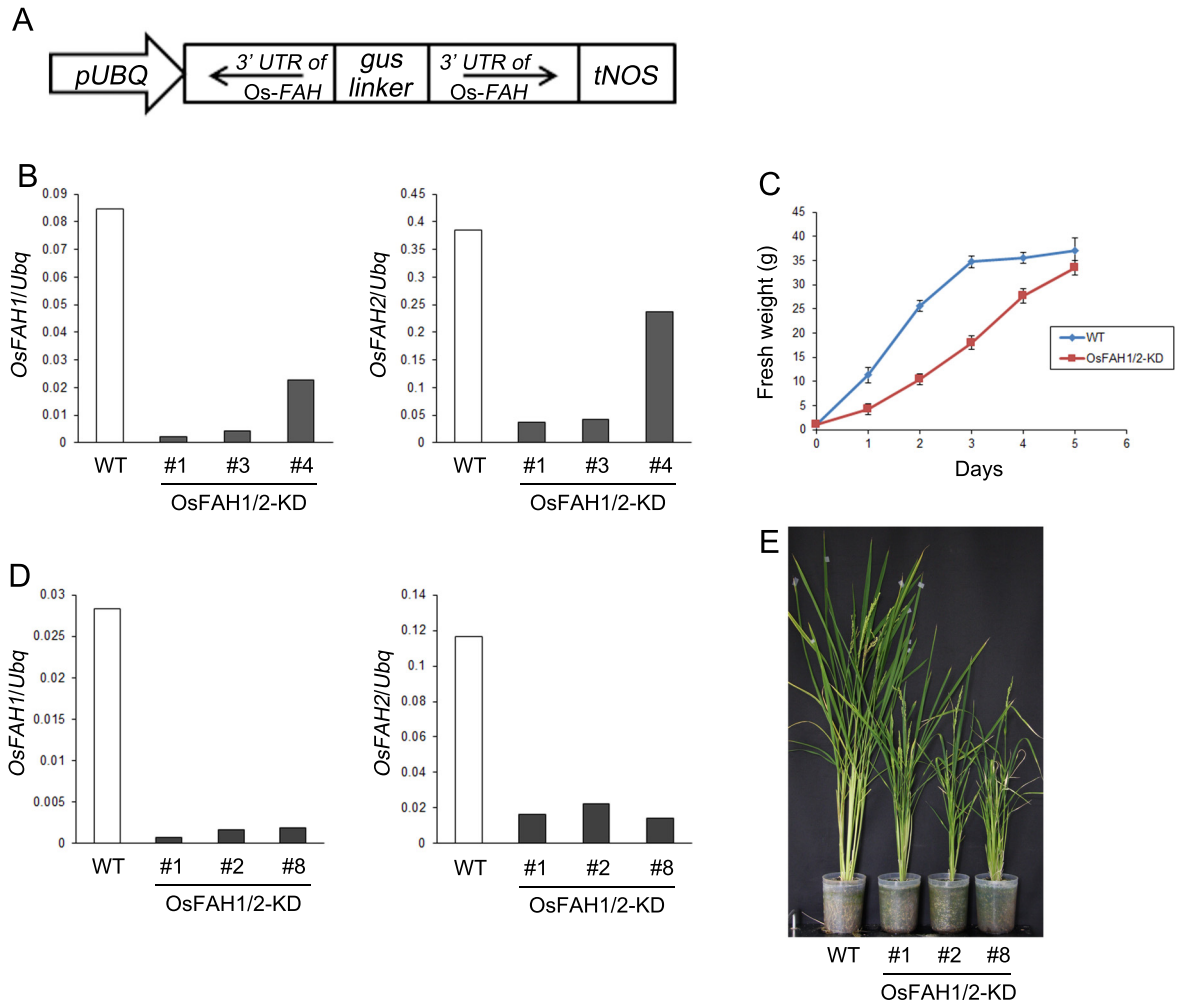

**Supplemental Figure 3: Establishment of OsFAH1/2-KD lines using an RNAi system**

(A) Schematic image of RNAi constructs. *pUBQ*, ubiquitin promoter, *tNOS*, terminator of the *nopaline synthase (NOS)* gene; *gus*,  $\beta$ -glucuronidase. (B) qRT-PCR of *Os-FAH1* and *Os-FAH2* in *OsFAH1/2-KD* suspension cells. (C) Growth of *OsFAH1/2-KD1* suspension cells. (D) qRT-PCR of *Os-FAH1* and *Os-FAH2* in *OsFAH1/2-KD* plants. (E) Phenotype of 3-month-old *OsFAH1/2-KD* plants.

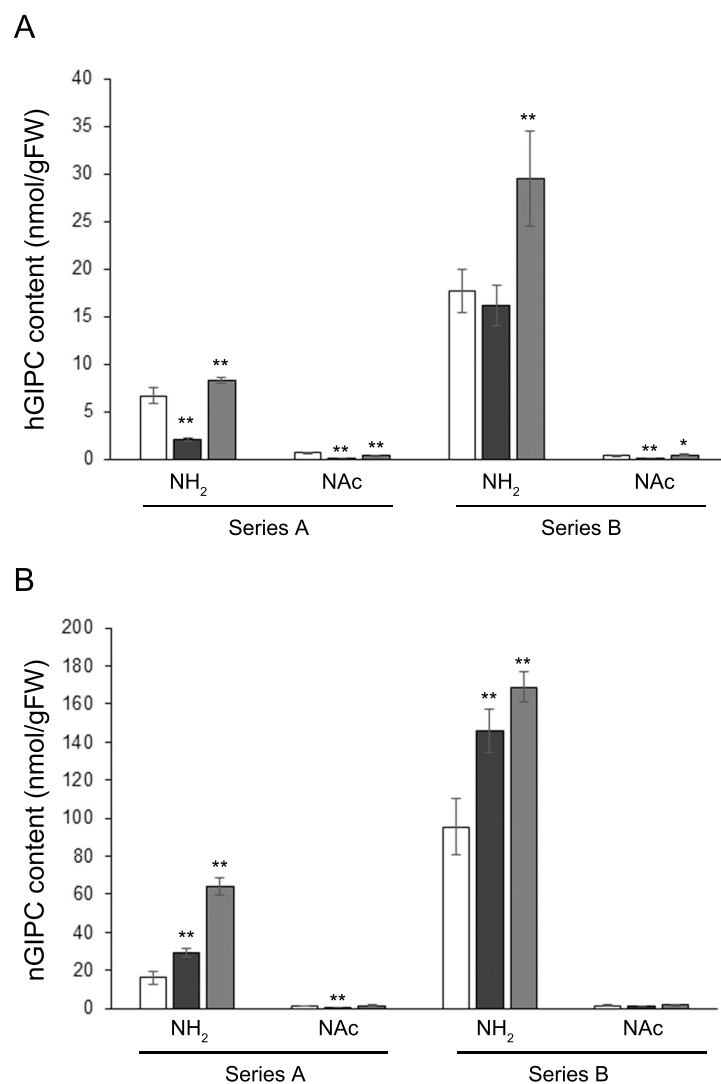

#### Supplemental Figure 4: GIPC content in whole cells of OsFAH1/2-KD lines

Four types of GIPCs in rice suspension cells were determined by LC-MS/MS. Series A and series B indicate Hex(NH<sub>2</sub> or NAc)-HexA-Ins-P-Cer and Hex-Hex(NH<sub>2</sub> or NAc)-HexA-Ins-P-Cer, respectively, according to Cacas et al. (2013). White, dark gray, or light gray bars indicate WT, OsFAH1/2-KD1 or OsFAH1/2-KD3, respectively.

(A) hGIPCs (B) nGIPCs. Data are means  $\pm$  SD (N = 4). Asterisks indicate significant differences compared to WT (Student's *t*-test; \**p* < 0.05, \*\**p* < 0.01).

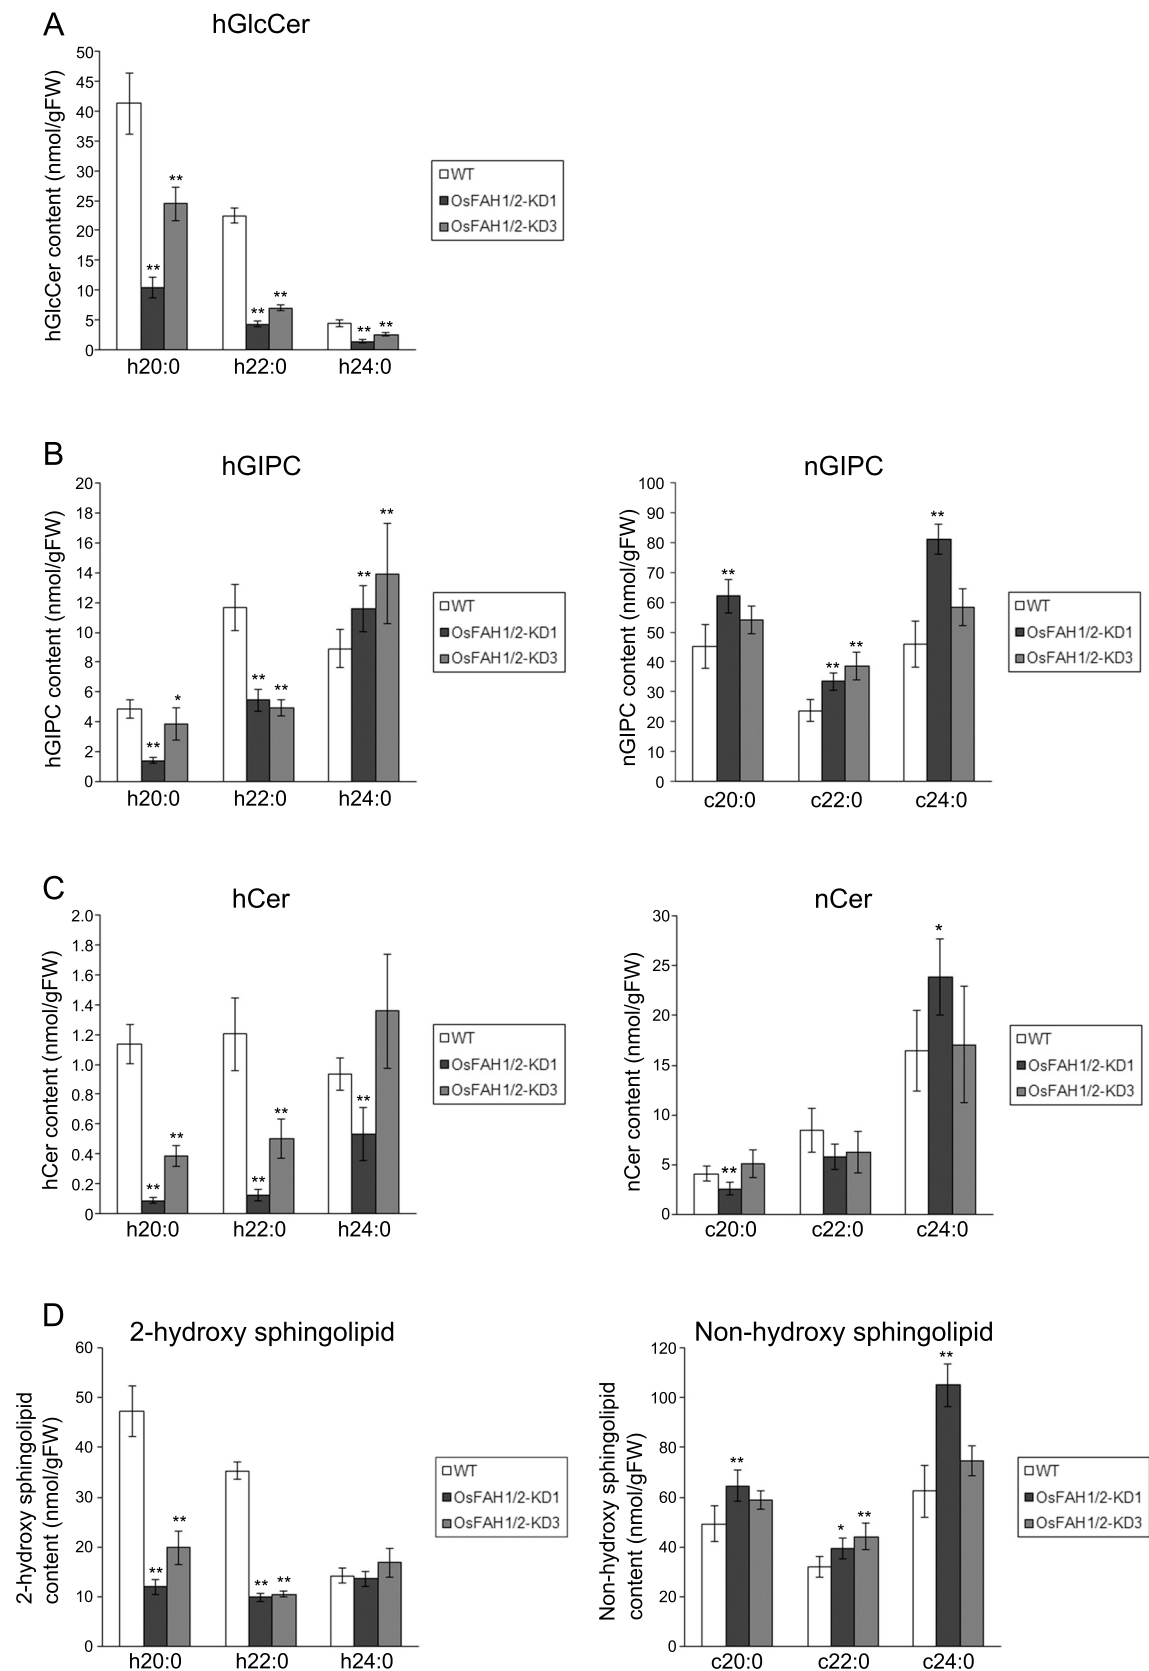

### Supplemental Figure 5: Fatty acid content of sphingolipids in OsFAH1/2-KD lines

Sphingolipid fatty acids with 20, 22 or 24 carbon chain length, with or without a 2-hydroxy group, in WT and OsFAH1/2-KD suspension cells were determined by LC-MS/MS and are shown as the amount of each class (A, GlcCer; B, GIPC; C, Cer; D, total sphingolipid). Data are means  $\pm$  SD ( $N = 4$ ). Asterisks indicate significant differences compared to WT (Student's  $t$ -test, \* $p < 0.05$ , \*\* $p < 0.01$ ).

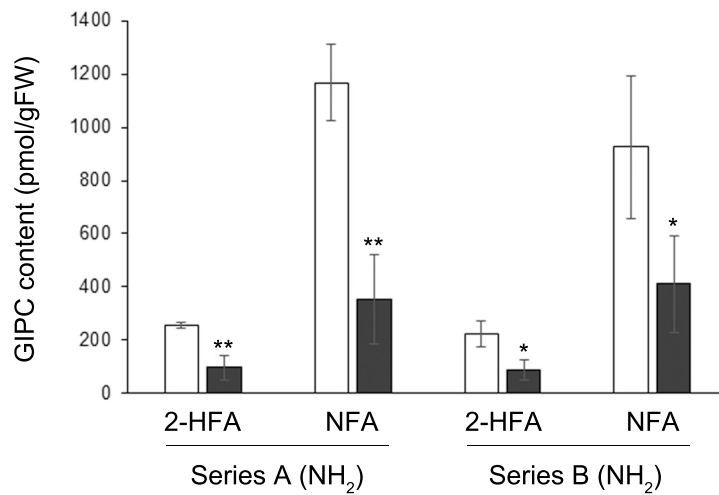

### Suppelemental Figure 6: GIPC content in DRM of OsFAH1/2-KD1

Two types of GIPCs in DRM of rice suspension cells (series A (NH<sub>2</sub>) and series B (NH<sub>2</sub>)) were determined by LC-MS/MS. White or dark gray bars indicate WT or OsFAH1/2-KD1, respectively. Data are means  $\pm$  SD ( $N = 3$ ). Asterisks indicate significant differences compared to WT (Student's  $t$ -test; \* $p < 0.05$ , \*\* $p < 0.01$ ). 2-HFA: 2-hydroxy fatty acid. NFA: non-hydroxy fatty acid. GIPCs containing NAc were too minor to be detected.

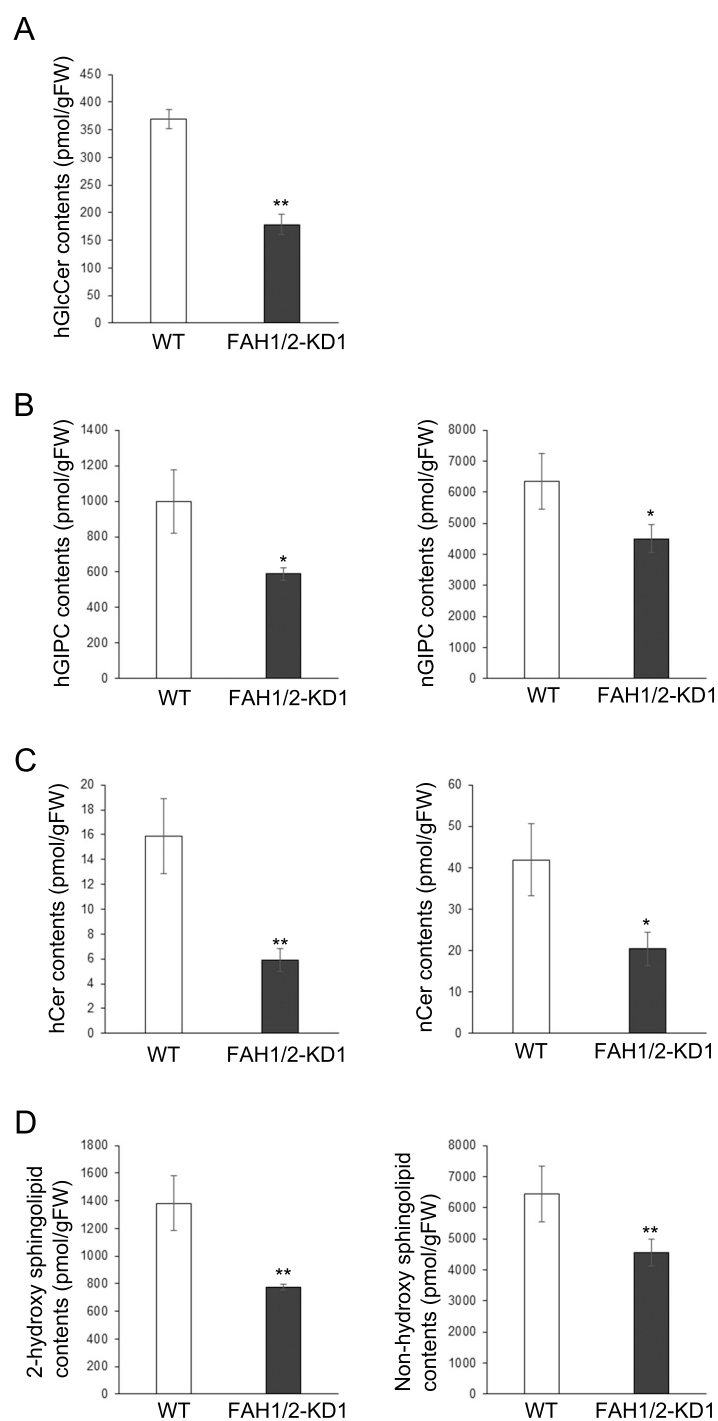

### Supplemental Figure 7: Sphingolipid content in PM of OsFAH1/2-KD lines

Amounts of each sphingolipid class (**A**, GlcCer; **B**, GIPC; **C**, Cer; **D**, total sphingolipid) in PM of WT and OsFAH1/2-KD1 suspension cells are shown for 2-HFA- and NFA-containing types. Data are means  $\pm$  SD ( $N = 4$ ). Asterisks indicate significant differences compared to WT (Student's  $t$ -test; \* $p < 0.05$ , \*\* $p < 0.01$ ).

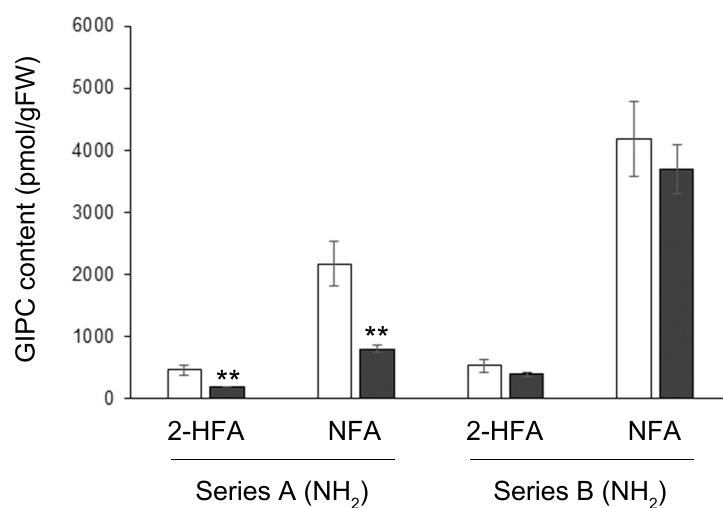

### Supplemental Figure 8: GIPC content in PM of OsFAH1/2-KD1

Two types of GIPCs in PM of rice suspension cells (series A (NH<sub>2</sub>) and series B (NH<sub>2</sub>)) were determined by LC-MS/MS. White or dark gray bars indicate WT or OsFAH1/2-KD1, respectively. Data are means  $\pm$  SD ( $N = 3$ ). Asterisks indicate significant differences compared to WT (Student's *t*-test; \*\* $p < 0.01$ ). 2-HFA: 2-hydroxy fatty acid. NFA: non-hydroxy fatty acid. GIPCs containing NAc were too minor to be detected.



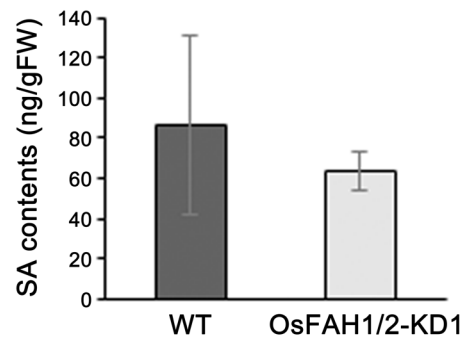

**Supplemental Figure 9: SA content in OsFAH1/2-KD suspension cells**  
SA was extracted from rice suspension cells and determined by LC-MS/MS.  
Data are means  $\pm$  SD ( $N = 4$ ).

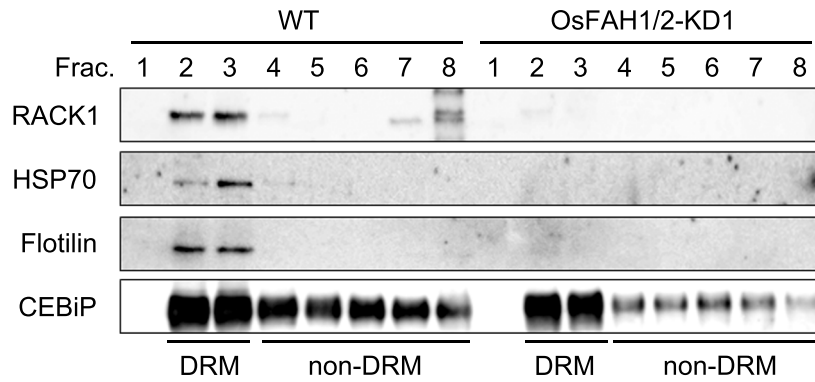

**Supplemental Figure 10: Protein analysis of PM fractions**

Immunoblot analysis of RACK1, HSP70, Flotilin and CEBiP in PM fractions. Fractions 2 and 3 contain DRMs and fractions 4-8 contain the non-DRM fractions.

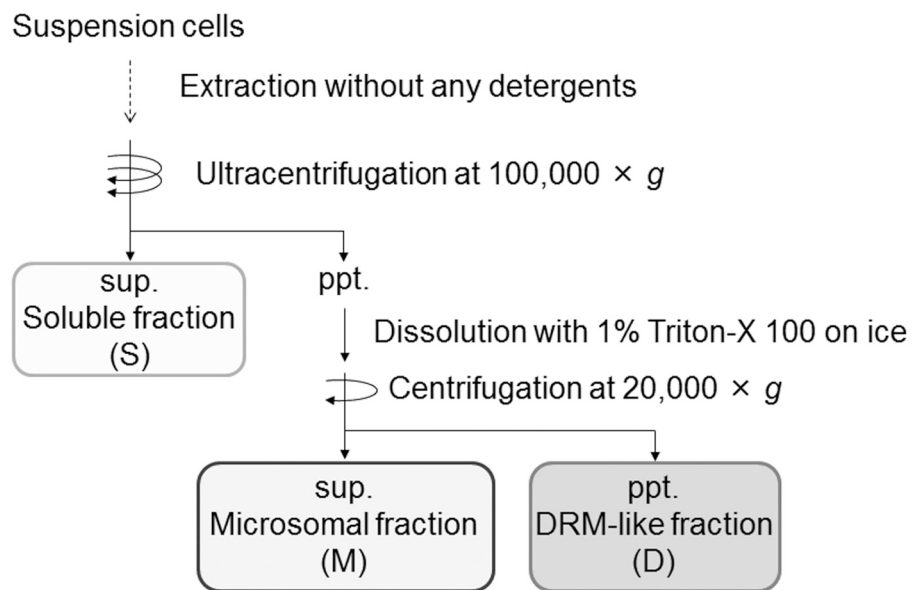

**Supplemental Figure 11: Flow chart of fractionation of rice suspension cells**

Extracts from WT and OsFAH1/2-KD1 were centrifuged at  $100,000 \times g$  and divided into supernatant (soluble fraction, S) and pellet. The pellet was dissolved with 1% Triton X-100 on ice at 30 min, centrifuged at  $20,000 \times g$ , and again divided into supernatant (microsomal fraction, M) and pellet (microsomal DRM-like fraction, D). Microsomal DRM-like fraction was markedly concentrated to detect a small amount of PM proteins

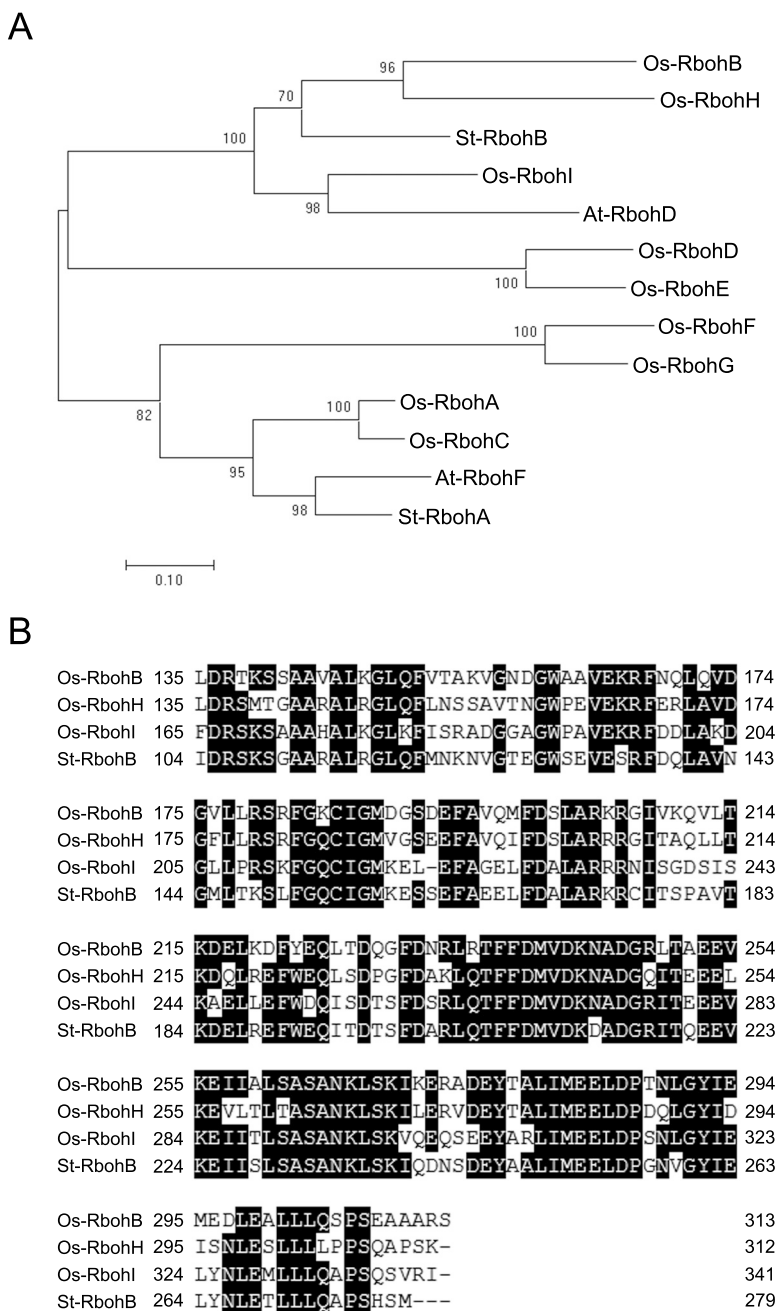

**Supplemental Figure 12: Phylogenetic relationships and comparison of Rboh proteins**

(A) A phylogenetic tree of Rboh proteins from rice, potato, and Arabidopsis. The bootstrap values are shown in percentage on the internal nodes. (B) Comparison of deduced amino acid sequences of the N-terminal EF-hand motif of Os-RbohB, Os-RbohH, Os-RbohI, and St-RbohB.

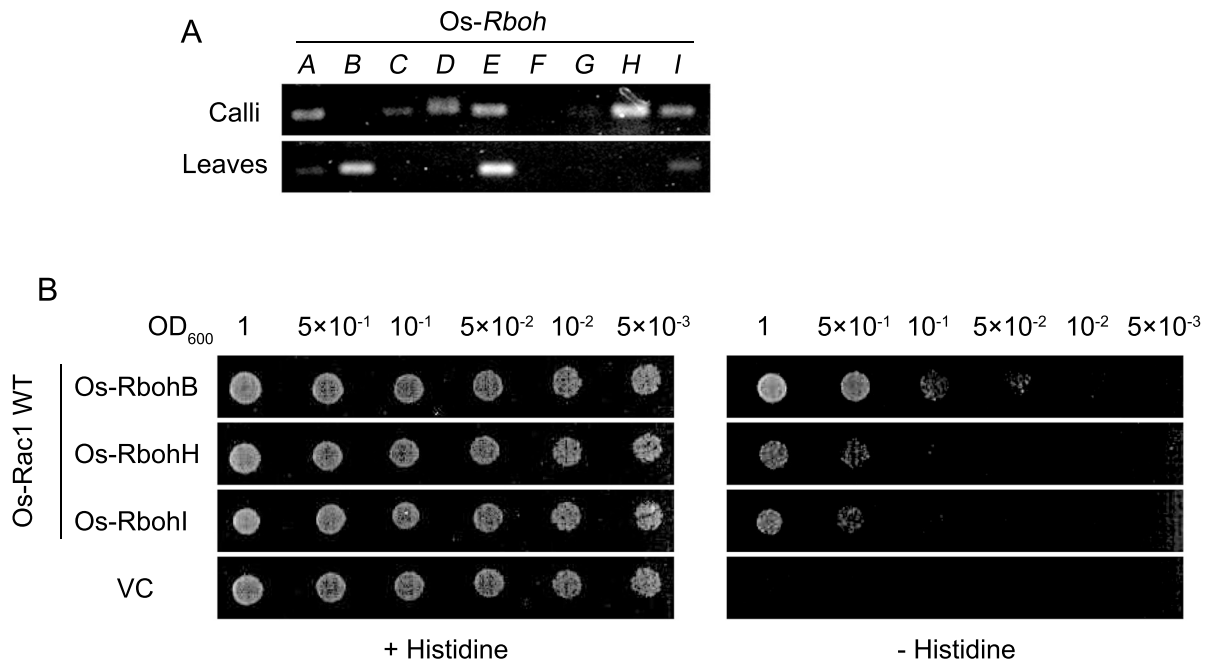

### Supplemental Figure 13: Analysis of Os-Rbohs

(A) Expression levels of *Os-RbohA*-*Os-RbohI* in rice calli and leaves were analyzed by RT-PCR (B) Interaction of Os-Rbohs with Os-Rac1 WT in the yeast two hybrid system. Yeast cells containing bait and prey constructs were tested for binding on minimum medium without histidine. The images display the growth of each line ( $OD_{600} = 1$  to  $5 \times 10^{-3}$ ) after 3 days of incubation at 30°C. Os-Rac1 WT and Os-Rbohs were used as bait and prey constructs, respectively. The combination of empty vectors was used as a vector control (VC).

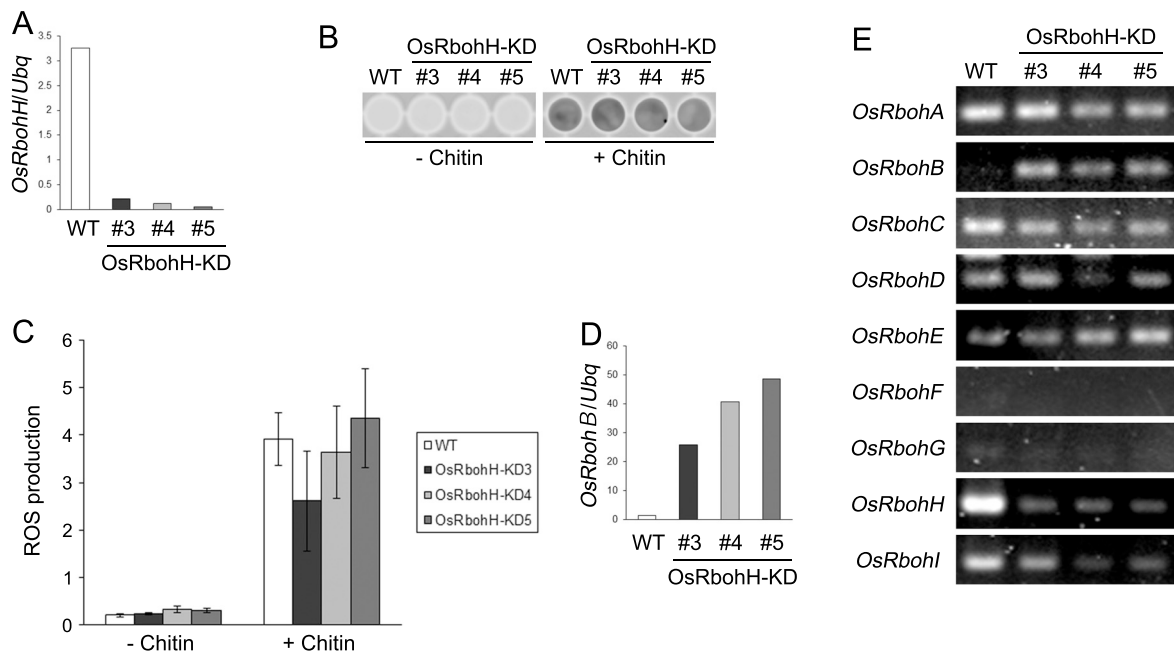

**Supplemental Figure 14: Analysis of OsRbohH-KD lines**

(A) qRT-PCR analysis of *Os-RbohH* transcription in OsRbohH-KD suspension cells.

(B) Example of ROS detection in OsRbohH-KD suspension cells by L-012 reagent.

(C) Quantification of ROS production in OsRbohH-KD suspension cells. Data are means  $\pm$  SD ( $N = 4$ ).

(D) qRT-PCR of *Os-RbohB* transcription in OsRbohH-KD suspension cells

(E) Transcriptional analysis of *Os-RbohA*-*Os-RbohI* in OsRbohH-KD suspension cells by RT-PCR.

**Supplemental Table 1. Primers used in this study.**

| Primer name                     | Sequence (5'-3')          |
|---------------------------------|---------------------------|
| <b>Primers for RNAi</b>         |                           |
| OsFAH1 F                        | GACTTGCGCTGCATTTTGCA      |
| OsFAH1 R                        | GCAGATTGCCCTCTCTACCA      |
| OsFAH2 F                        | CTGAGCCACTGACAGAAATG      |
| OsFAH2 R                        | ATCTGAATTCAGAACATTGGATGTC |
| OsRbohB F                       | GGTACAAATTGAGAAATACC      |
| OsRbohB R                       | GGTCACAACAAAGAGAACTTC     |
| OsRbohH F                       | GATCATCGGATTCATCGTCG      |
| OsRbohH R                       | GTGGTAAGCTTTATATCATCG     |
| <b>Primers for construction</b> |                           |
| OsFAH1 F                        | ATGGTTGCAGAGGCCTTTAC      |
| OsFAH1 R                        | AGAGCTCTTCTTGTCGATGG      |
| OsFAH2 F                        | ATGGTTGTCCAGGAGTTCAC      |
| OsFAH2 R                        | GTTGTTCTTTCCGGTGGTCT      |
| OsRac1 F                        | ATGAGCTCGGCGGCGGC         |
| OsRac1 R                        | CTACGCGAAACAAGCGCTTC      |
| <b>Primers for qRT-PCR</b>      |                           |
| OsFAH1 F                        | GCCTGTTGGGTTATGTGATGT     |
| OsFAH1 R                        | TGGTATTTCTTGAGGTGTTTTCC   |
| OsFAH2 F                        | CAAAGAGCCAGCGAAAAATC      |
| OsFAH2 R                        | AGTGATGAGGTGATGCCAAA      |
| Ubq F                           | AACCAGCTGAGGCCCAAGA       |
| Ubq R                           | ACGATTGATTTAACCAGTCCATGA  |
| OsRac1 F                        | CGCCTGGTGTTCCTGTAGTT      |
| OsRac1 R                        | CCTCAGTTCTTCTCCCTGCT      |
| OsPIP1;1 F                      | CACTGATGCCAAGAGGAATG      |
| OsPIP1;1 R                      | ACCAGGAACACCGCAAAA        |
| OsPIP1;2 F                      | ACCGACGCCAAGAGGAAC        |
| OsPIP1;2 R                      | GAACCAAGAACACCGCAAAC      |
| OsPIP1;3 F                      | GCCACCATCCCCATCACC        |
| OsPIP1;3 R                      | AACGGACCAACCCAGAAAA       |
| OsRbohB F                       | CAGCAAGGCGAAGAAGAAAC      |
| OsRbohB R                       | CCTCTGAACCACTCAAACGA      |
| OsRbohH F                       | CCACCACCTCTTCGTCATC       |
| OsRbohH R                       | TGTCGTCTGCTTCCACCAA       |
| OsRbohI F                       | GCGGAGACGGACAAGAAG        |
| OsRbohI R                       | TGAGCGACTGGAGCATAG        |
